# Supplementary material for: Message in a molecule
Source: PubMed Central journal article supplement (PMC4857388; doi:10.1038/ncomms11374), 2016-05-03
Supplement: ncomms11374-s1.pdf [file ncomms11374-s1.pdf]

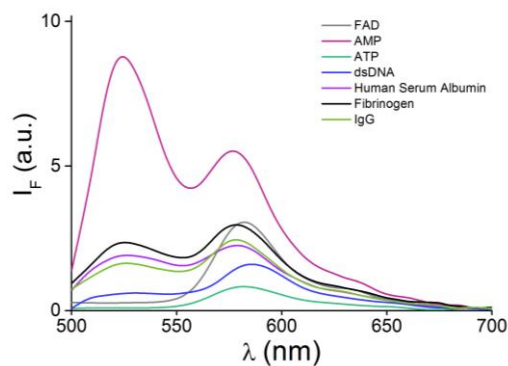

**Supplementary Figure 1** | Representative emission patterns generated by m-SMS in response to different sugar phosphates and proteins.

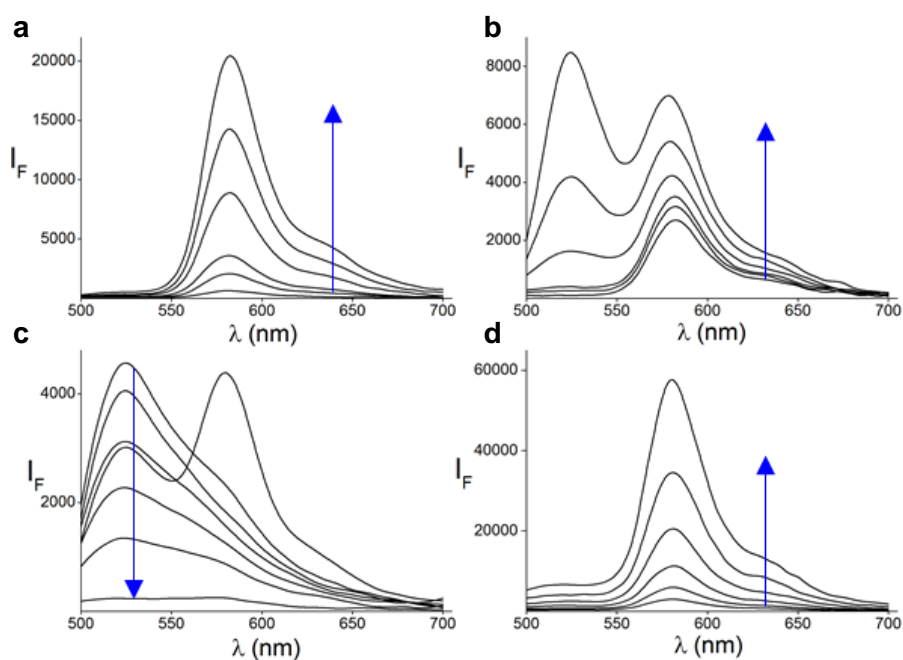

**Supplementary Figure 2** | (a) Distinct fluorescence patterns were generated using different concentrations (0.1, 0.3, 0.5, 1, 2, and 4  $\mu\text{M}$ ) of m-SMS in ethanol-AcOH (10 mM). Patterns generated upon the addition of 1  $\mu\text{L}$  of (b) NaOH (3, 30, 60, 300, 420, and 480 mM) or (c) an aqueous solution of  $\text{CuCl}_2$  (0, 0.04, 0.6, 40, 80, 120, and 200 mM) to a 60  $\mu\text{L}$  solution of m-SMS in ethanol-AcOH (10 mM) or ethanol-AcOH (10 mM) and NaOH (6 mM), respectively. (d) Emission spectra obtained by setting the detector gain value to 100, 110, 120, 130, 140, and 150.

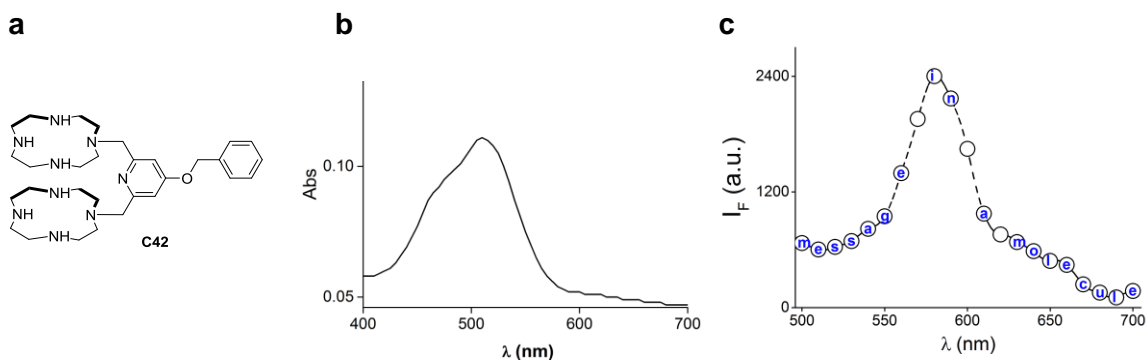

**Supplementary Figure 3** | (a) The structure of compound **C42**. (b) Absorption spectrum of  $\text{CoCl}_2$ , which was expected from letter paper.  $\text{CoCl}_2$  was spotted and dried ( $4\mu\text{L}$ , 2 M) on letter paper and sent to a recipient. The recipient extracted the chemical ( $\text{CoCl}_2$ ) from the paper by dissolving it in water ( $240\text{--}300\mu\text{L}$ ) and calibrated its concentration according to the absorption at 510 nm and an extinction coefficient of  $4.85\text{ M}^{-1}\text{ cm}^{-1}$ . (c) Decryption key generated by adding the extracted chemical input ( $1\mu\text{L}\text{ CoCl}_2$ , 35 mM) to  $60\mu\text{L}$  m-SMS (500 nM) in EtOH-AcOH (10 mM) and NaOH (6 mM).

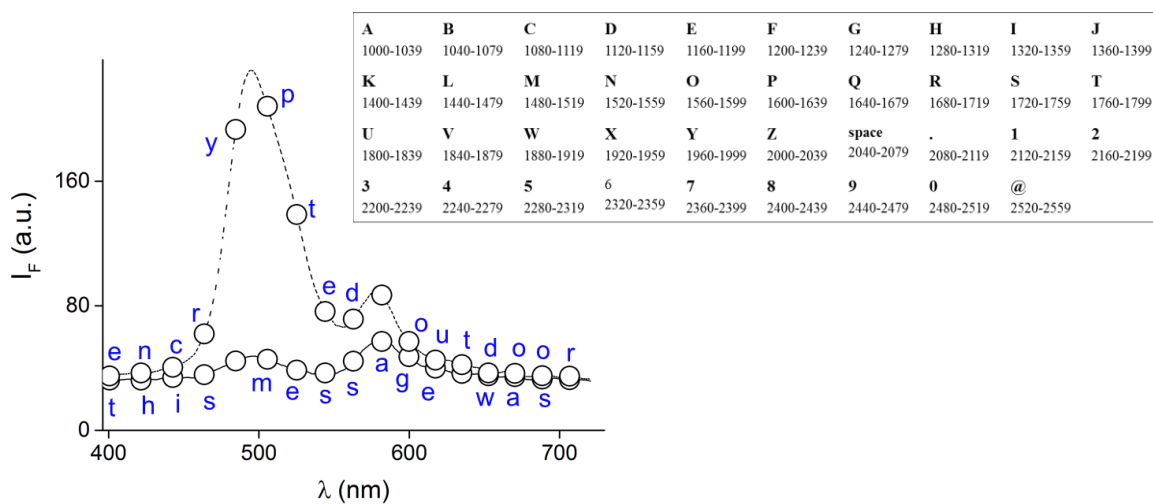

**Supplementary Figure 4** | Encrypting a message using a hand-held spectrofluorometer. The encryption key was generated by recording the emission spectrum of m-SMS ( $2.2\mu\text{M}$ ) in ethanol ( $600\mu\text{L}$ ) before (solid line) and after adding  $1\mu\text{L}$   $\text{NaHCO}_3$  ( $0.98\text{ M}$ ) (dashed line). Inset: the corresponding alphanumeric code.

**Supplementary Table 1.** A list of messages encrypted using m-SMS.

| Entry           | Input                | Message                                   | Spectral Range (nm) | Interval (nm) |
|-----------------|----------------------|-------------------------------------------|---------------------|---------------|
| 1 <sup>a</sup>  | ATP                  | my supervisor drives me crazy             | 546-658             | 4             |
| 2 <sup>b</sup>  | NiCl <sub>2</sub>    | send me your results ASAP                 | 500-740             | 10            |
| 3 <sup>a</sup>  | AMP                  | a message is hidden in this chemical      | 500-710             | 6             |
| 4 <sup>c</sup>  | ascorbic acid        | my sensor is working                      | 500-614             | 6             |
| 5 <sup>c</sup>  | lemon Juice          | package arrived                           | 500-640             | 10            |
| 6 <sup>b</sup>  | NaOH                 | pershing sails                            | 500-695             | 15            |
|                 | CuCl <sub>2</sub>    | from NY June 1                            | 500-695             | 15            |
| 7 <sup>b</sup>  | NaOH                 | pershing sails                            | 500-695             | 15            |
|                 | eyedrop              | from NY June 1                            | 500-695             | 15            |
| 8 <sup>e</sup>  | CuCl <sub>2</sub>    | pershing sails from NY June 1             | 500-780             | 10            |
| 9 <sup>a</sup>  | ATP                  | message in a bottle                       | 542-650             | 6             |
| 10 <sup>d</sup> | m-SMS in EtOH-AcOH   | hostile column of                         | 560-624             | 4             |
|                 | NiCl <sub>2</sub>    | infantry observed                         | 560-624             | 4             |
|                 | KOH                  | extends from south exit of Bear Woods     | 500-660             | 4             |
|                 | Na <sub>4</sub> EDTA | to position 3 kilometers east of neustadt | 500-656             | 4             |
| 11 <sup>b</sup> | CoCl <sub>2</sub>    | meet me @ east gate @6pm                  | 500-644             | 6             |
| 12 <sup>a</sup> | NiCl <sub>2</sub>    | Searching SciFinder                       | 500-680             | 10            |
| 13 <sup>c</sup> | Nescafe              | come @science museum @8pm                 | 500-740             | 10            |
| 14 <sup>d</sup> | NaOH                 | leaving to position 5                     | 500-660             | 8             |
| 15 <sup>d</sup> | diet Coke            | message in a bottle                       | 500-644             | 8             |
| 16 <sup>b</sup> | CoCl <sub>2</sub>    | message in a molecule                     | 500-700             | 10            |
| 17 <sup>f</sup> | C42                  | the code has been broken                  | 550-642             | 4             |
| 18 <sup>g</sup> | none                 | this message was                          | 400.6-700.7         | each 20       |
|                 | NaHCO <sub>3</sub>   | encrypted outdoor                         | 400.6-720.6         | points        |

m-SMS in <sup>a</sup>EtOH, <sup>b</sup>EtOH-AcOH (10 mM) and NaOH (6 mM), <sup>c</sup>EtOH-AcOH (10 mM) and NaOH (10 mM), and <sup>d</sup>EtOH-AcOH (10 mM), <sup>e</sup> m-SMS (5 μM) in ACN and NaOH(11 mM), <sup>f</sup>m-SMS in EtOH and Na<sub>3</sub>PO<sub>4</sub> (65 μM); the concentration of C42 was 40 μM, <sup>g</sup>m-SMS (2.2 μM) in EtOH, this message was generated using a hand-held spectrophotometer (I<sub>F</sub>= 2000 AU).

**Supplementary Table 2.** List of encryption keys, cipher texts and decryption keys corresponding to the messages presented in Supplementary Table 1.

| <b>Message 1</b> |             |                | <b>Message 2</b> |             |                | <b>Message 3</b> |             |                |
|------------------|-------------|----------------|------------------|-------------|----------------|------------------|-------------|----------------|
| encryption key   | cipher text | decryption key | encryption key   | cipher text | decryption key | encryption key   | cipher text | decryption key |
| 374              | 4124        | 423            | 525              | 6075        | 497            | 990              | 1140        | 968            |
| 456              | 7806        | 498            | 758              | 2108        | 747            | 2012             | 9962        | 1938           |
| 561              | 8511        | 607            | 941              | 4991        | 982            | 3642             | 7392        | 3634           |
| 744              | 6294        | 780            | 910              | 1960        | 954            | 5039             | 6389        | 4854           |
| 1035             | 7185        | 1040           | 845              | 4595        | 861            | 5647             | 11197       | 5564           |
| 1415             | 6065        | 1381           | 810              | 2160        | 794            | 5367             | 10917       | 5217           |
| 1786             | 3136        | 1782           | 925              | 8275        | 867            | 4626             | 4776        | 4477           |
| 2110             | 7360        | 2160           | 1385             | 5735        | 1262           | 3715             | 5665        | 3676           |
| 2366             | 8816        | 2454           | 1525             | 7675        | 1556           | 3140             | 4490        | 3066           |
| 2447             | 4997        | 2576           | 1405             | 6655        | 1314           | 2889             | 10839       | 2767           |
| 2368             | 7918        | 2479           | 1005             | 6255        | 939            | 3133             | 5683        | 2959           |
| 2168             | 6518        | 2232           | 760              | 2110        | 629            | 3759             | 9309        | 3737           |
| 1912             | 7162        | 1924           | 546              | 6096        | 478            | 4463             | 12413       | 4325           |
| 1604             | 9554        | 1632           | 482              | 6632        | 399            | 4698             | 6948        | 4665           |
| 1340             | 2390        | 1380           | 337              | 3787        | 380            | 4437             | 6987        | 4501           |
| 1143             | 6393        | 1194           | 258              | 6108        | 199            | 3684             | 4734        | 3763           |
| 934              | 3484        | 1025           | 198              | 5748        | 232            | 3025             | 4075        | 2811           |
| 783              | 7233        | 881            | 174              | 324         | 57             | 2274             | 3624        | 2095           |
| 662              | 2012        | 781            | 105              | 5655        | 124            | 1744             | 5794        | 1706           |
| 620              | 6170        | 715            | 115              | 265         | 89             | 1326             | 9276        | 1282           |
| 612              | 8562        | 663            | 62               | 4712        | 55             | 1253             | 3803        | 1195           |
| 579              | 4329        | 636            |                  |             |                | 1132             | 5182        | 1019           |
| 568              | 1918        | 610            |                  |             |                | 996              | 8946        | 988            |
| 501              | 8451        | 543            |                  |             |                | 870              | 6720        | 911            |
| 431              | 1181        | 494            |                  |             |                | 752              | 3002        | 650            |
| 397              | 5647        | 439            |                  |             |                | 607              | 3157        | 608            |
| 385              | 535         | 417            |                  |             |                | 405              | 5955        | 462            |
| 310              | 7960        | 380            |                  |             |                | 487              | 8437        | 321            |
| 239              | 7589        | 368            |                  |             |                | 297              | 1047        | 157            |
|                  |             |                |                  |             |                | 246              | 2496        | 310            |
|                  |             |                |                  |             |                | 231              | 1581        | 236            |
|                  |             |                |                  |             |                | 158              | 3908        | 226            |
|                  |             |                |                  |             |                | 100              | 2650        | 32             |
|                  |             |                |                  |             |                | 147              | 897         | 34             |
|                  |             |                |                  |             |                | 254              | 404         | 79             |
|                  |             |                |                  |             |                | 99               | 3549        | 101            |

| Message 4      |             |                | Message 5      |             |                | Message 6      |             |                |
|----------------|-------------|----------------|----------------|-------------|----------------|----------------|-------------|----------------|
| encryption key | cipher text | decryption key | encryption key | cipher text | decryption key | encryption key | cipher text | decryption key |
| 266            | 4016        | 283            | 448            | 5098        | 383            | 600            | 5250        | 677            |
| 299            | 7649        | 320            | 488            | 638         | 482            | 1495           | 2845        | 1516           |
| 340            | 8290        | 360            | 538            | 1288        | 557            | 1617           | 6867        | 1634           |
| 366            | 5916        | 383            | 581            | 3731        | 560            | 1390           | 6940        | 1373           |
| 364            | 1714        | 389            | 574            | 724         | 557            | 1814           | 4064        | 1761           |
| 349            | 4399        | 379            | 606            | 2556        | 520            | 3403           | 5953        | 3480           |
| 342            | 5892        | 371            | 595            | 1945        | 589            | 3121           | 7171        | 3159           |
| 337            | 4687        | 385            | 749            | 8699        | 853            | 1785           | 3735        | 1785           |
| 355            | 5605        | 395            | 864            | 1014        | 951            | 1075           | 9025        | 1128           |
| 384            | 8334        | 423            | 736            | 5986        | 855            | 863            | 6413        | 901            |
| 465            | 3015        | 473            | 547            | 5797        | 621            | 547            | 697         | 595            |
| 560            | 6110        | 583            | 394            | 2944        | 435            | 272            | 2822        | 289            |
| 684            | 8634        | 729            | 323            | 6773        | 351            | 150            | 3600        | 187            |
| 767            | 7517        | 849            | 325            | 1675        | 268            | 203            | 5753        | 180            |
| 771            | 5121        | 876            | 241            | 1291        | 283            |                |             |                |
| 706            | 5956        | 791            |                |             |                | 796            | 2446        | 936            |
| 595            | 3745        | 647            |                |             |                | 2159           | 7409        | 2305           |
| 476            | 3026        | 529            |                |             |                | 2504           | 6854        | 2529           |
| 372            | 4422        | 423            |                |             |                | 1928           | 5678        | 1949           |
| 299            | 2249        | 349            |                |             |                | 1552           | 9502        | 1562           |
|                |             |                |                |             |                | 1323           | 5373        | 1299           |
|                |             |                |                |             |                | 964            | 8314        | 981            |
|                |             |                |                |             |                | 573            | 8523        | 622            |
|                |             |                |                |             |                | 418            | 3268        | 415            |
|                |             |                |                |             |                | 259            | 6409        | 404            |
|                |             |                |                |             |                | 189            | 4239        | 116            |
|                |             |                |                |             |                | 73             | 1423        | 120            |
|                |             |                |                |             |                | 42             | 7992        | 89             |
|                |             |                |                |             |                | 38             | 8588        | 6              |

| Message 7         |                |                   | Message 8         |                |                   | Message 9         |                |                   |
|-------------------|----------------|-------------------|-------------------|----------------|-------------------|-------------------|----------------|-------------------|
| encryption<br>key | cipher<br>text | decryption<br>key | encryption<br>key | cipher<br>text | decryption<br>key | encryption<br>key | cipher<br>text | decryption<br>key |
| 1196              | 5846           | 1225              | 122               | 4772           | 125               | 364               | 4114           | 382               |
| 3619              | 4969           | 3731              | 207               | 1557           | 203               | 413               | 1763           | 435               |
| 3169              | 8419           | 3293              | 265               | 5515           | 258               | 561               | 6111           | 624               |
| 1900              | 7450           | 1972              | 293               | 5843           | 287               | 882               | 6432           | 969               |
| 2242              | 4492           | 2122              | 295               | 2545           | 296               | 1415              | 1565           | 1494              |
| 3933              | 6483           | 3852              | 321               | 2871           | 321               | 1959              | 3909           | 2063              |
| 3367              | 7417           | 3375              | 374               | 4424           | 375               | 2366              | 3716           | 2433              |
| 1792              | 3742           | 1815              | 568               | 2518           | 561               | 2430              | 10380          | 2486              |
| 1126              | 9076           | 1109              | 766               | 8716           | 765               | 2168              | 4718           | 2219              |
| 942               | 6492           | 933               | 800               | 6350           | 815               | 1751              | 5801           | 1774              |
| 552               | 702            | 589               | 659               | 809            | 639               | 1340              | 9290           | 1381              |
| 354               | 2904           | 352               | 528               | 3078           | 533               | 1038              | 1188           | 1025              |
| 227               | 3677           | 245               | 458               | 3908           | 461               | 783               | 8733           | 872               |
| 156               | 5706           | 119               | 463               | 6013           | 440               | 637               | 1087           | 740               |
|                   |                |                   | 687               | 8637           | 669               | 612               | 4962           | 708               |
| 2096              | 3746           | 1996              | 1258              | 2908           | 1243              | 580               | 6430           | 606               |
| 5487              | 10737          | 5573              | 2344              | 7594           | 2336              | 501               | 6351           | 521               |
| 5924              | 10274          | 6002              | 3226              | 7576           | 3220              | 388               | 3838           | 432               |
| 3825              | 7575           | 3739              | 3215              | 6965           | 3252              | 385               | 1735           | 374               |
| 3376              | 11326          | 3297              | 2637              | 10587          | 2593              |                   |                |                   |
| 4849              | 8899           | 4943              | 2028              | 6078           | 2008              |                   |                |                   |
| 4426              | 11776          | 4391              | 1453              | 8803           | 1474              |                   |                |                   |
| 2547              | 10497          | 2415              | 1133              | 9083           | 1132              |                   |                |                   |
| 1589              | 4439           | 1516              | 1066              | 3916           | 1050              |                   |                |                   |
| 1215              | 7365           | 1093              | 1030              | 7180           | 1089              |                   |                |                   |
| 835               | 4885           | 693               | 890               | 4940           | 862               |                   |                |                   |
| 534               | 1884           | 638               | 734               | 2084           | 748               |                   |                |                   |
| 323               | 8273           | 311               | 529               | 8479           | 513               |                   |                |                   |
| 175               | 8725           | 240               | 410               | 8960           | 477               |                   |                |                   |

| Message 10     |             |                |                |             |                |                |             |                |
|----------------|-------------|----------------|----------------|-------------|----------------|----------------|-------------|----------------|
| encryption key | cipher text | decryption key | encryption key | cipher text | decryption key | encryption key | cipher text | decryption key |
| 1042           | 3292        | 1047           | 841            | 2191        | 826            | 1127           | 6977        | 1153           |
| 1502           | 5852        | 1495           | 1439           | 8489        | 1404           | 1969           | 6319        | 1986           |
| 2002           | 7552        | 1983           | 1913           | 7763        | 1862           | 2638           | 10588       | 2646           |
| 2455           | 8305        | 2423           | 2263           | 3613        | 2198           | 3134           | 7784        | 3133           |
| 2799           | 5349        | 2754           | 2489           | 6539        | 2413           | 3455           | 7805        | 3447           |
| 2968           | 6418        | 2913           | 2591           | 3641        | 2508           | 3603           | 9153        | 3589           |
| 2947           | 4297        | 2875           | 2525           | 8075        | 2430           | 3508           | 6058        | 3483           |
| 2753           | 10703       | 2695           | 2320           | 10270       | 2226           | 3230           | 9080        | 3201           |
| 2452           | 3202        | 2395           | 2046           | 3696        | 1956           | 2844           | 5394        | 2817           |
| 2091           | 6441        | 2057           | 1752           | 7002        | 1669           | 2450           | 6800        | 2417           |
| 1741           | 5191        | 1719           | 1490           | 5840        | 1428           | 2092           | 6142        | 2071           |
| 1453           | 7603        | 1424           | 1281           | 5031        | 1232           | 1803           | 9753        | 1779           |
| 1222           | 4972        | 1188           | 1131           | 9081        | 1095           | 1593           | 10743       | 1579           |
| 1041           | 5091        | 1011           | 1044           | 6894        | 1019           | 1465           | 4615        | 1459           |
| 914            | 8864        | 901            | 994            | 3244        | 974            | 1429           | 3979        | 1417           |
| 824            | 5174        | 813            | 972            | 2322        | 950            | 1475           | 4925        | 1451           |
| 767            | 2417        | 759            | 987            | 8937        | 952            | 1590           | 5940        | 1542           |
|                |             |                | 1012           | 6562        | 962            | 1739           | 5489        | 1665           |
|                |             |                | 1020           | 5370        | 955            | 1895           | 3245        | 1780           |
| 315            | 1362        | 328            | 1013           | 7163        | 925            | 2000           | 7850        | 1877           |
| 401            | 1896        | 419            | 971            | 6821        | 889            | 2027           | 3377        | 1904           |
| 480            | 2463        | 514            | 913            | 3163        | 821            | 1977           | 7227        | 1851           |
| 557            | 2980        | 602            | 833            | 8783        | 743            | 1851           | 7401        | 1737           |
| 617            | 3370        | 672            | 746            | 2096        | 667            | 1672           | 9622        | 1573           |
| 657            | 3571        | 713            | 643            | 7693        | 584            | 1457           | 2807        | 1377           |
| 655            | 3531        | 716            | 567            | 3117        | 509            | 1248           | 1398        | 1178           |
| 623            | 3318        | 684            | 491            | 6341        | 458            | 1064           | 6614        | 1007           |
| 577            | 2972        | 621            | 425            | 8375        | 413            | 914            | 6764        | 864            |
| 503            | 2559        | 540            | 382            | 4732        | 373            | 785            | 8735        | 751            |
| 437            | 2156        | 462            | 346            | 1996        | 333            | 692            | 5042        | 659            |
| 368            | 1792        | 383            | 316            | 8266        | 301            | 632            | 2282        | 590            |
| 308            | 1496        | 325            | 300            | 750         | 279            | 596            | 8546        | 554            |
| 262            | 1274        | 274            | 281            | 1631        | 258            | 571            | 4621        | 518            |
| 224            | 1126        | 244            | 260            | 410         | 237            | 533            | 1883        | 493            |
| 198            | 1011        | 219            | 237            | 5487        | 219            | 499            | 6649        | 459            |
| 191            | 949         | 206            | 219            | 8169        | 192            | 451            | 6001        | 431            |
|                |             |                | 188            | 6938        | 176            | 402            | 6252        | 395            |
|                |             |                | 175            | 4525        | 156            | 353            | 503         | 362            |
|                |             |                | 167            | 4517        | 142            | 301            | 1351        | 313            |
|                |             |                | 163            | 1213        | 128            | 269            | 6119        | 279            |
|                |             |                | 143            | 5693        | 128            |                |             |                |

| Message 11     |             |                | Message 12     |             |                | Message 13     |             |                |
|----------------|-------------|----------------|----------------|-------------|----------------|----------------|-------------|----------------|
| encryption key | cipher text | decryption key | encryption key | cipher text | decryption key | encryption key | cipher text | decryption key |
| 300            | 4050        | 337            | 525            | 6075        | 497            | 1680           | 2430        | 1664           |
| 358            | 1708        | 354            | 758            | 2108        | 747            | 3758           | 8108        | 3934           |
| 406            | 1756        | 405            | 941            | 1091        | 982            | 6102           | 9852        | 6101           |
| 437            | 6287        | 456            | 910            | 6160        | 954            | 6123           | 7473        | 6061           |
| 448            | 8398        | 464            | 845            | 1595        | 861            | 5052           | 13002       | 4946           |
| 438            | 4188        | 449            | 810            | 3060        | 794            | 4053           | 15603       | 3988           |
| 416            | 1766        | 425            | 925            | 3475        | 867            | 3812           | 9362        | 3718           |
| 403            | 8353        | 416            | 1385           | 5435        | 1262           | 4758           | 5508        | 4655           |
| 412            | 11962       | 425            | 1525           | 3475        | 1556           | 5245           | 7795        | 5178           |
| 455            | 8405        | 457            | 1405           | 9355        | 1314           | 4502           | 5852        | 4431           |
| 548            | 1898        | 543            | 1005           | 6555        | 939            | 3298           | 7348        | 3244           |
| 710            | 860         | 710            | 760            | 1510        | 629            | 2301           | 3051        | 2198           |
| 885            | 6435        | 918            | 546            | 3096        | 478            | 1780           | 3130        | 1740           |
| 999            | 6849        | 1072           | 482            | 2132        | 399            | 1568           | 9518        | 1550           |
| 1006           | 8956        | 1076           | 337            | 2887        | 380            | 1305           | 5055        | 1274           |
| 903            | 2853        | 952            | 258            | 4308        | 199            | 989            | 7139        | 1005           |
| 747            | 897         | 765            | 198            | 1248        | 232            | 785            | 6335        | 776            |
| 572            | 6422        | 607            | 174            | 1524        | 57             | 615            | 3165        | 636            |
| 449            | 1799        | 468            | 105            | 5355        | 124            | 389            | 6539        | 351            |
| 367            | 8317        | 382            |                |             |                | 458            | 4208        | 545            |
| 316            | 11866       | 331            |                |             |                | 378            | 8328        | 337            |
| 269            | 8219        | 291            |                |             |                | 215            | 11765       | 173            |
| 236            | 10286       | 250            |                |             |                | 198            | 10848       | 278            |
| 220            | 4870        | 235            |                |             |                | 125            | 4775        | 168            |
| 201            | 3951        | 210            |                |             |                | 201            | 3951        | 154            |



| Message 14     |             |                | Message 15     |             |                | Message 16     |             |                |
|----------------|-------------|----------------|----------------|-------------|----------------|----------------|-------------|----------------|
| encryption key | cipher text | decryption key | encryption key | cipher text | decryption key | encryption key | cipher text | decryption key |
| 531            | 3981        | 540            | 204            | 3954        | 253            | 669            | 4419        | 894            |
| 693            | 2043        | 677            | 250            | 1600        | 300            | 602            | 1952        | 660            |
| 831            | 981         | 838            | 285            | 5835        | 280            | 629            | 6179        | 648            |
| 847            | 7297        | 955            | 311            | 5861        | 325            | 690            | 6240        | 612            |
| 818            | 3368        | 864            | 294            | 444         | 358            | 816            | 966         | 750            |
| 746            | 4796        | 847            | 299            | 2249        | 335            | 947            | 2897        | 846            |
| 765            | 2715        | 799            | 353            | 1703        | 341            | 1395           | 2745        | 1512           |
| 778            | 8728        | 871            | 395            | 8345        | 438            | 1956           | 9906        | 1776           |
| 1132           | 6982        | 1096           | 574            | 3124        | 621            | 2400           | 4950        | 2730           |
| 1487           | 5837        | 1531           | 749            | 4799        | 855            | 2168           | 6218        | 2136           |
| 1770           | 9720        | 1833           | 910            | 8860        | 982            | 1647           | 9597        | 1776           |
| 1642           | 6292        | 1756           | 830            | 980         | 911            | 973            | 1123        | 1008           |
| 1287           | 5637        | 1345           | 668            | 8618        | 728            | 758            | 8708        | 546            |
| 935            | 6485        | 947            | 555            | 1005        | 517            | 679            | 4429        | 468            |
| 703            | 3253        | 656            | 374            | 4724        | 382            | 586            | 4936        | 546            |
| 584            | 6434        | 497            | 324            | 6174        | 357            | 483            | 3933        | 276            |
| 495            | 3045        | 494            | 326            | 6176        | 303            | 443            | 1793        | 816            |
| 448            | 4798        | 412            | 233            | 3683        | 272            | 241            | 991         | 126            |
| 360            | 4410        | 323            | 152            | 1502        | 206            | 154            | 6304        | 522            |
| 256            | 8206        | 223            |                |             |                | 104            | 3554        | 60             |
| 248            | 9998        | 208            |                |             |                | 172            | 1522        | 444            |

| Message 17     |             |                | Message 18     |             |                |
|----------------|-------------|----------------|----------------|-------------|----------------|
| encryption key | cipher text | decryption key | encryption key | cipher text | decryption key |
| 134            | 5984        | 168            | 31             | 1811        | 32             |
| 181            | 2431        | 215            | 30             | 1330        | 33             |
| 238            | 1588        | 284            | 35             | 1375        | 32             |
| 288            | 8238        | 368            | 33             | 1773        | 32             |
| 465            | 1215        | 538            | 42             | 2102        | 36             |
| 603            | 4953        | 654            | 48             | 1548        | 39             |
| 766            | 1816        | 818            | 38             | 1218        | 36             |
| 845            | 2195        | 944            | 37             | 1777        | 33             |
| 894            | 8844        | 986            | 42             | 1782        | 35             |
| 844            | 3094        | 958            | 56             | 1076        | 43             |
| 813            | 963         | 859            | 48             | 1308        | 38             |
| 634            | 6184        | 736            | 40             | 1220        | 36             |
| 611            | 8561        | 682            | 35             | 2095        | 33             |
| 453            | 903         | 528            | 34             | 1934        | 33             |
| 433            | 1783        | 449            | 33             | 1053        | 32             |
| 300            | 1650        | 436            | 33             | 1773        | 32             |
| 336            | 4386        | 381            |                |             |                |
| 256            | 8206        | 254            | 35             | 1175        | 36             |
| 265            | 715         | 285            | 37             | 1217        | 36             |
| 238            | 5488        | 271            | 40             | 1140        | 39             |
| 228            | 4578        | 223            | 54             | 1754        | 52             |
| 235            | 3385        | 254            | 160            | 2140        | 142            |
| 215            | 1565        | 173            | 223            | 1843        | 218            |
| 155            | 4205        | 199            | 157            | 1937        | 168            |
|                |             |                | 85             | 1265        | 91             |
|                |             |                | 68             | 1208        | 69             |
|                |             |                | 89             | 2149        | 87             |
|                |             |                | 57             | 1637        | 57             |
|                |             |                | 45             | 1865        | 46             |
|                |             |                | 40             | 1820        | 40             |
|                |             |                | 36             | 1176        | 36             |
|                |             |                | 35             | 1615        | 35             |
|                |             |                | 34             | 1614        | 35             |
|                |             |                | 33             | 1733        | 32             |

## Supplementary Methods

### General Information

All chemicals, sugars, metal salts, and anhydrous solvents were obtained from Sigma Aldrich. Glycoseptol mouth wash, GenTeal eye drops, and Otrivin nasal spray were purchased from a local pharmaceutical store, and diet Coke, lemon juice (Sicilia), Nescafe, wine, Carlsberg beer, and BLU energy drink were obtained from a local grocery store. ssDNA and dsDNA stands for 5'GTCACGTCATAGCTGCCTCTACTGTCGATCGTCGTA<sup>3'</sup> and A20.T20, respectively, which were obtained from W. M. Keck Foundation Biotechnology at Yale University. Deuterated solvents were purchased from Cambridge Isotope Laboratories, Inc. or Armar Chemicals. Anhydrous solvents were transferred using an oven-dried syringe. Flasks were oven-dried under a stream of argon. The <sup>1</sup>H NMR and <sup>13</sup>C NMR spectra were recorded on a Bruker Avance 300 MHz, a Bruker Avance 400 MHz, or an Agilent VNMRS 600 MHz spectrometer. The chemical shifts are represented in ppm on the  $\delta$  scale down field from TMS as the internal standard. The following abbreviations were used to describe the peaks: s-singlet, d-doublet, t-triplet, q-quartet, and m-multiplet. Electrospray ionization mass spectral data (ESI-MS) were recorded on a Micromass Platform LCZ-4000 instrument at the Weizmann Institute of Science mass spectrometry facility. Flash column chromatography was performed on an automated Combiflash Teledyne ISCO instrument. The analytical reversed-phase high-performance liquid chromatography (RP-HPLC) data were obtained on an Agilent Technologies 1260 Infinity HPLC (equipped with diode array UV detector and autosampler) using a C<sub>18</sub> column. m-SMS was purified by preparative RP-HPLC using a Thermo Scientific separation instrument (P200 pump, UV 100 detector), and a pre-packed Vydac C<sub>18</sub> column. Fluorescence measurements were carried out using a BioTek synergy H4 hybrid multiwell plate reader and using black flat-bottom polystyrene NBS 384-well microplates (Corning). For the experiments using a handheld spectrophotometer the spectra were acquired using a SpectroVis Plus spectrophotometer (Vernier). Linear discriminant analysis was performed using XLSTAT version 2014.1.01. The following illustrations in the Figures 1 and 5 were used under license from Shutterstock.com: keyboard (credit:

Alhovik), pipette (credit: extender\_01), hand-writing text (credit: amiloslava) and man character (credit: Leremy).

## Abbreviations

|                      |                                                                                               |
|----------------------|-----------------------------------------------------------------------------------------------|
| ACN                  | acetonitrile                                                                                  |
| AcOH                 | acetic acid                                                                                   |
| AMP                  | adenosine monophosphate                                                                       |
| ATP                  | adenosine triphosphate                                                                        |
| DCM                  | dichloromethane                                                                               |
| DIEA                 | N,N'-diisopropylethylamine                                                                    |
| DMF                  | N,N'-dimethylformamide                                                                        |
| DMSO                 | dimethyl Sulfoxide                                                                            |
| DPA                  | di-(2-picolyl)amine                                                                           |
| dsDNA                | double strand DNA                                                                             |
| EDC                  | 1-ethyl-3-(3-dimethylaminopropyl)carbodiimide                                                 |
| EtOH                 | ethanol                                                                                       |
| FAD                  | flavin adenine dinucleotide                                                                   |
| HATU                 | 1-[bis(dimethylamino)methylene]-1H-1,2,3-triazolo[4,5-b]pyridinium 3-oxid hexafluorophosphate |
| HOBT                 | hydroxybenzotriazole                                                                          |
| LDA                  | linear discriminant analysis                                                                  |
| Na <sub>4</sub> EDTA | tetrasodium ethylenediaminetetraacetic                                                        |
| ssDNA                | single strand DNA                                                                             |
| TFA                  | trifluoroacetic acid                                                                          |
| THF                  | tetrahydrofuran                                                                               |

## Synthesis of m-SMS

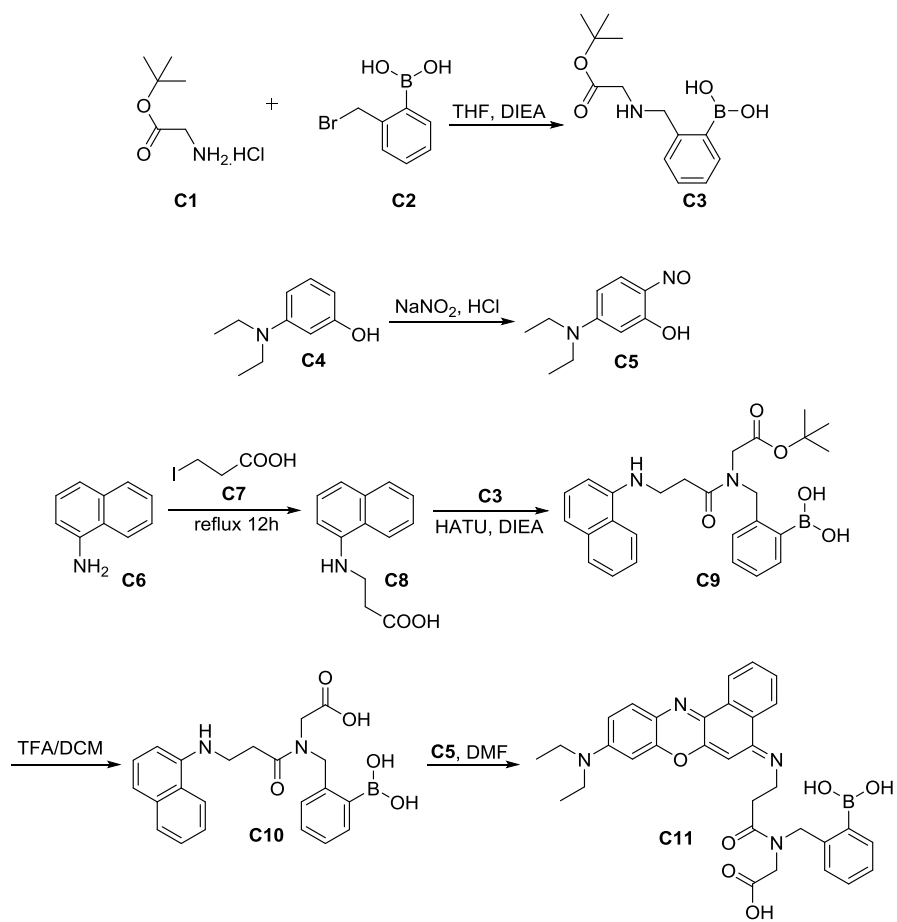

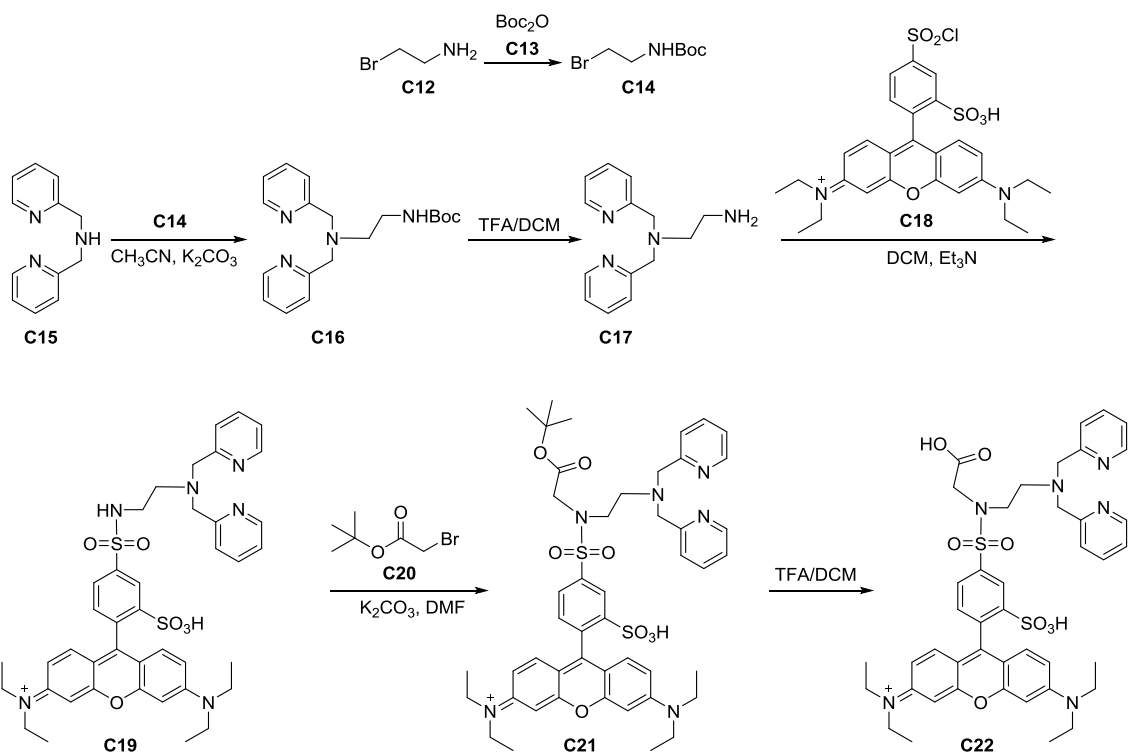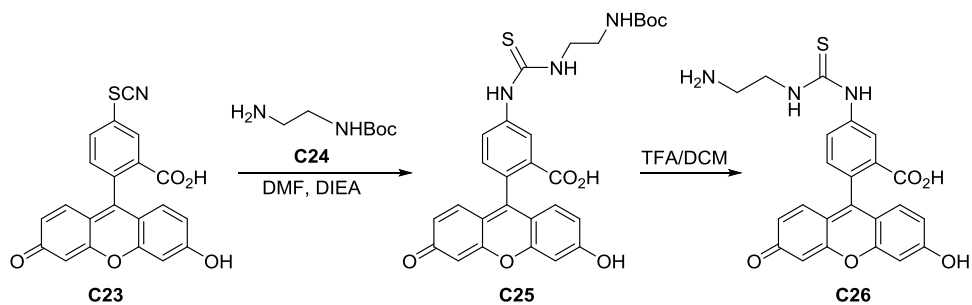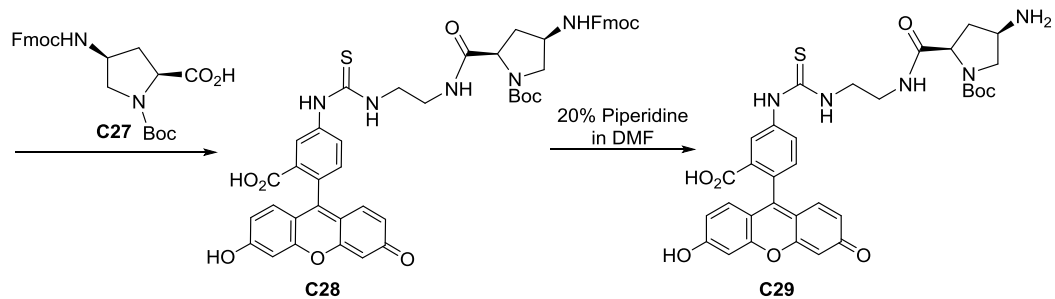

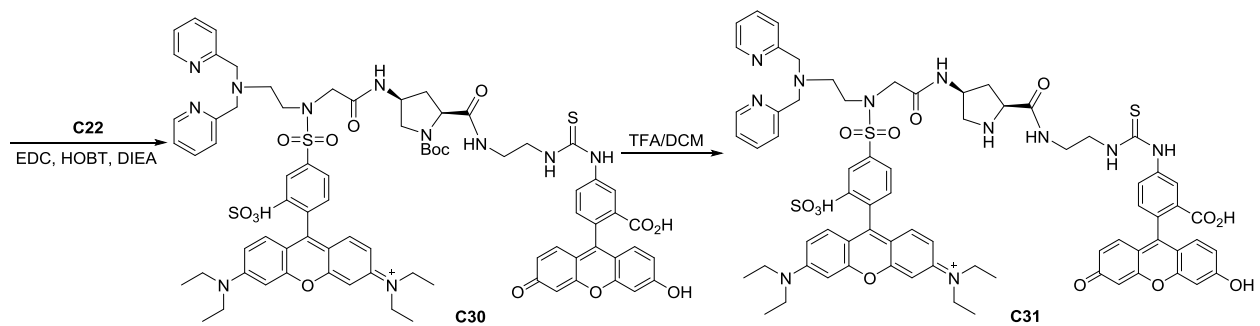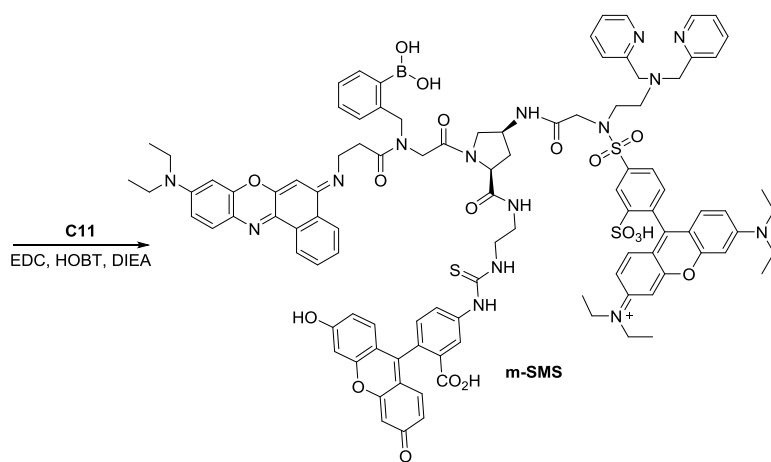

## Synthesis of m-SMS<sub>2</sub>

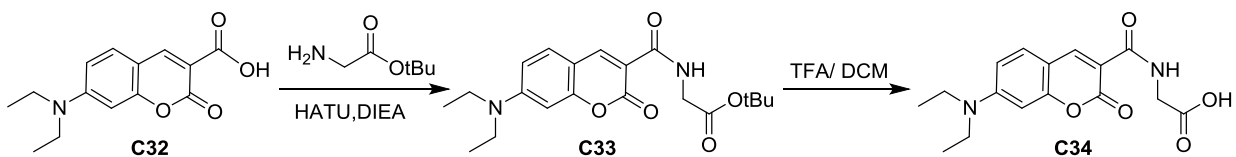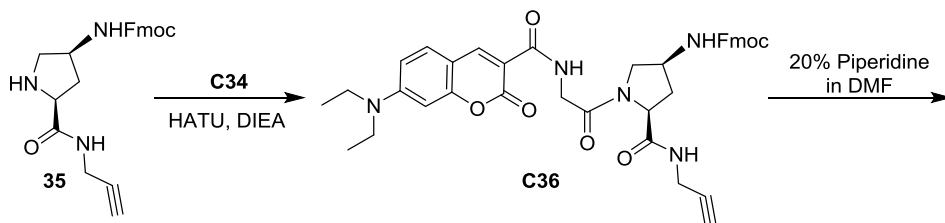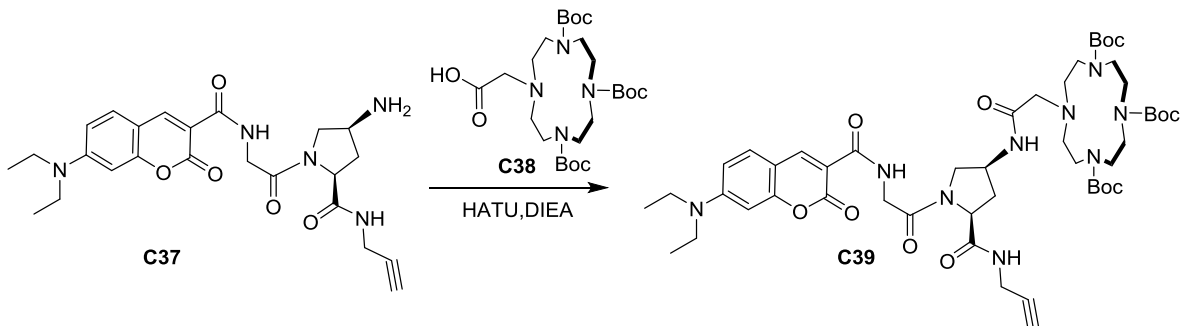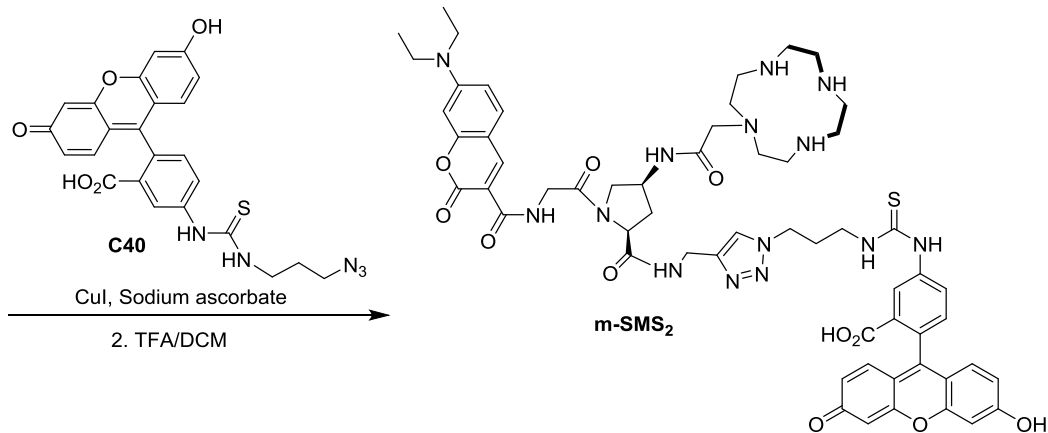



## Synthetic Procedures

**Compound C3:** To a stirred solution of **C1** (tert-butyl glycinate) (0.4 g, 3.05 mmol) in dry THF (20 mL) were added **C2** (2-bromomethyl phenyl boronic acid) (0.59 g, 2.77 mmol) and triethylamine (0.8 mL, 6.08 mmol) under argon. The solution was refluxed at 70 °C for 8 h. Thereafter, the solvent was evaporated, the residue was dissolved in DCM/MeOH (4:1 v/v, 50 mL) and washed twice with water (50 mL) and then with brine (20 mL). The organic layer was dried over anhydrous sodium sulfate. Then the solvent was evaporated to dryness and the crude reaction mixture was subjected to combi-flash column chromatography (silica gel, 7.2% MeOH in DCM) to obtain **C3** (0.56 g) as a white solid in 76% yield. <sup>1</sup>H NMR (300 MHz, CD<sub>3</sub>OD): δ = 7.45-7.43 (t, *J* = 6 Hz, 1H), 7.23- 7.21 (t, *J* = 6 Hz, 2H), 7.17- 7.15 (br m, 1H), 4.15 (s, 2H), 3.56 (s, 2H), 1.55 (s, 9H); <sup>13</sup>C NMR (75 MHz, CD<sub>3</sub>OD): δ = 168.33, 141.19, 130.04, 127.15, 126.33, 122.63, 82.40, 54.44, 49.02, 35.0, 29.28. <sup>13</sup>C NMR (75 MHz, CD<sub>3</sub>OD): 168.3, 170.7, 130.0, 127.1, 126.3, 82.5, 54.3, 29.4, 26.8. HRMS-ESI (*m/z*): calcd. for [M+Na+2MeOH-2H<sub>2</sub>O]<sup>+</sup> 316.1696; found 316.1690.

**Compound C8:** Compound **C7** (3-iodopropanoic acid) (0.502 g, 2.5 mmol) was added to a stirred solution of **C6** (naphthalen-1-amine) (0.3 g, 2.1 mmol) in dry EtOH (20 mL). Then the reaction mixture was stirred for 12 h under argon at 80 °C. After the reaction was completed, solvent was evaporated and the residue was dissolved in ethyl acetate (50 mL), washed twice with water (50 mL) and then with brine (20 mL). The organic layer was dried over anhydrous sodium sulfate and evaporated to dryness. The crude product was subjected to combi-flash column chromatography (silica gel, 25% EtOAc in hexane) to yield **C8** (0.26 g) in 58% yield. <sup>1</sup>H NMR (300 MHz, CD<sub>3</sub>OD): δ = 7.97-7.95 (m, 1H), 7.83-7.71 (m, 1H), 7.40- 7.38 (t, *J* = 3 Hz, 2H), 7.32-7.27 (t, *J* = 6 Hz, 1H), 7.16 (d, *J* = 9 Hz, 1H), 6.63 (d, *J* = 6 Hz, 1H), 3.77-3.72 (t, *J* = 6 Hz, 2H), 2.76- 2.72 (t, *J* = 6 Hz, 2H); <sup>13</sup>C NMR (75 MHz, CDCl<sub>3</sub>) δ = 177.5, 142.1, 138.5, 134.3, 128.6, 126.4, 125.9, 125.1, 119.9, 118.6, 105.3, 39.7, 33.2. HRMS-ESI (*m/z*): calcd. for [M+H]<sup>+</sup> 216.1025; found 216.1023.

**Compound C9:** A solution of compound **C8** (0.178 g, 0.83 mmol) in DCM (4 mL) was cooled to 0 °C. Then, HATU (0.34 g, 0.91 mmol) and a solution of compound **C3** in

DCM/DMF (3:1 v/v, 2 mL) were added. After adding DIEA (0.11 mL, 0.83 mmol), the reaction mixture was stirred at room temperature for 18h under argon. After the reaction was completed and monitored by TLC, the solvent was removed in vacuum and the crude material was subjected to column chromatography (silica gel, 30% EtOAc in hexane) to afford **C9** (0.169 g) in a 49% yield. <sup>1</sup>H NMR (300 MHz, CDCl<sub>3</sub>): δ = 7.90 (d, *J* = 6 Hz, 1H), 7.78 (d, *J* = 9 Hz, 1H), 7.47-7.42 (m, 3H), 7.37- 7.32 (t, *J* = 9 Hz, 2H), 7.27-7.24 (m, 3H), 6.65 (d, *J* = 6 Hz, 1H), 6.25 (br s, 1H), 3.94 (s, 2H), 3.92 (s, 2H), 3.66-3.62 (t, *J* = 6 Hz, 2H), 2.69- 2.66 (t, *J* = 6 Hz, 2H), 1.46 (s, 9H); <sup>13</sup>C NMR (75 MHz, CD<sub>3</sub>OD) δ = 173.9, 143.1, 139.3, 134.5, 131.7, 131.5, 128.8, 128.3, 127.9, 126.9, 126.2, 125.2, 124.0, 123.8, 120.4, 116.71, 103.7, 81.8, 52.5, 39.7, 31.7, 31.5, 26.8. HRMS-ESI (*m/z*): calcd. for [M+Na+2MeOH-2H<sub>2</sub>O]<sup>+</sup> 513.2537; found 513.2531.

**Compound C11:** Trifluoroacetic acid (1 mL) was added to a solution of compound **C9** (0.18 g, 0.38 mmol) in DCM (1 mL) at 0 °C. Then the reaction mixture was allowed to warm up to room temperature and stirring was continued for 2 h. After the reaction was completed, DCM and TFA were evaporated and the residue was dried under high vacuum for 6 h. This crude mass of compound **C10** is sufficiently pure for use in the next step. The crude solid **C10** (0.13 g; 0.32 mmol) was dissolved in DMF (10 mL). After adding compound **C5**<sup>1</sup> (0.63 g, 0.326 mmol), the reaction mixture was heated to 70 °C and stirred for 5 h. After removing the solvent, the crude material was purified by combi-flash column chromatography (silica gel, 5% MeOH in DCM) to afford crystalline blue solid of **C11** (0.110 g, 58%). <sup>1</sup>H NMR (300 MHz, CD<sub>3</sub>OD): δ = 8.70-8.63 (m, 1H), 8.32 (d, *J* = 6 Hz, 1H), 8.22 (d, *J* = 6 Hz, 1H), 7.82-7.78 (m, 1H), 7.74-7.67 (t, *J* = 6 Hz, 2H), 7.33-7.29 (br, 2H), 7.23-7.18 (, t, *J* = 6 Hz, 2H), 6.83 (s, 1H), 6.76 (br s, 1H), 4.73 (s, 2H), 4.01 (s, 2H), 3.97- 3.95 (br m, 2H), 3.70- 3.67 (t, *J* = 3 Hz 4H), 3.06-2.95 (br m , 2H), 1.37-1.32 (t, *J*=6 Hz, 6H). <sup>13</sup>C NMR (75 MHz, CD<sub>3</sub>OD) δ = 173.9, 171.8, 156.9, 154.1, 150.5, 147.53, 134.7, 132.5, 131.2, 130.2, 129.8, 128.8, 127.8, 126.3, 123.6, 122.7, 122.6, 115.5, 115.4, 95.2, 93.2, 52.6, 47.3, 40.5, 33.9, 30.7, 11.1. HRMS-ESI (*m/z*): calcd. for [M+Na+2MeOH-2H<sub>2</sub>O]<sup>+</sup> 631.2704; found 631.2703.

**Compound C14:** To a solution of **C12** (2- bromoethylamine hydrobromide) (1 g, 4.9 mmol) in dry THF (25 mL) was added dropwise a solution of **C13** (di-*t*-butyl

dicarbonate) (1.1 g, 4.9 mmol) in THF (15 mL) followed by Et<sub>3</sub>N (0.77 mL, 5.39 mmol). After stirring the mixture for 8h, the solvent was evaporated. Then the residue was dissolved in DCM/MeOH (4:1 v/v, 50 mL) and washed twice with water (50 mL) and then with brine (20 mL). The organic layer was dried over anhydrous sodium sulfate. Then the solvent was evaporated to dryness and the crude product was subjected to combi-flash column chromatography (silica gel, 5% hexane in EtOAc) to obtain the desired product **C14** (0.56 g) as a white solid in 52% yield. <sup>1</sup>H NMR (300 MHz, CDCl<sub>3</sub>): δ = 5.06 (br s, 1H), 3.62 (t, *J* = 3 Hz, 2H), 3.42 (q, *J* = 3 Hz, 2H), 1.50 (s, 9H). <sup>13</sup>C NMR (75 MHz, CDCl<sub>3</sub>) δ = 161.1, 65.0, 41.5, 40.4, 27.1. MS-ESI (*m/z*): calcd. for [M+Na]<sup>+</sup> 246.01; found 246.06.

**Compound C16**<sup>2</sup>: Compound **C15** (0.5 g, 2.51 mmol) in anhydrous CH<sub>3</sub>CN (20 mL) was refluxed in the presence of K<sub>2</sub>CO<sub>3</sub> (0.59 g, 2.51 mmol) and potassium iodide (0.095 g, 0.57 mmol) under argon for 30 min. Then **C14** (0.618 g, 2.76 mmol) was added and the reaction mixture was refluxed for 6h. After the reaction was completed, the solvent was evaporated and the residue was dissolved in ethyl acetate (50 mL) and washed twice with water (50 mL) and then with brine (20 mL). The organic layer was dried over anhydrous sodium sulfate and evaporated to dryness. The crude was subjected to combi-flash column chromatography (silica gel, 2% MeOH in DCM) to afford **C16** (0.48 g) in a 55% yield. <sup>1</sup>H NMR (300 MHz, CDCl<sub>3</sub>): δ = 8.55 (d, *J* = 6 Hz, 2H), 7.66-7.61 (t, *J* = 6 Hz, 2H), 7.42 (d, *J* = 6 Hz, 2H), 7.17-7.13 (t, *J* = 6 Hz, 2H), 5.81 (br s, 1H), 3.78 (s, 4H), 3.24-3.22 (m, 2H), 2.74-2.70 (t, *J* = 6 Hz, 2H), 1.43 (s, 9H). <sup>13</sup>C NMR (75 MHz, CDCl<sub>3</sub>): δ = 148.6, 136.9, 136.8, 123.6, 122.5, 122.4, 59.5, 55.8, 50.9, 30.9, 27.8. MS-ESI (*m/z*): calcd. for [M+Na]<sup>+</sup>, 365.19; found 365.22, calcd. for [2M+Na]<sup>+</sup> 707.40; found 707.46.

**Compound C19**: A solution of compound **C16** (0.3 g, 0.87 mmol) in 50% TFA in DCM (2 mL) was stirred for 3h at room temperature. After the reaction was completed, DCM and TFA were evaporated and the residue was dried in vacuum to afford compound **C17**<sup>2</sup> as a sticky solid. Compound **C17** (0.187 g, 0.774 mmol) was dissolved in dry DCM (8 mL) and the solution was basified to pH 7-8 with Et<sub>3</sub>N (0.18 mL, 1.6 mmol). This solution was added dropwise to a stirred solution of **C18** (Lissamine Rhodamine B Sulfonyl Chloride) (0.4 g, 0.69 mmol) in dry DCM (20 mL). After adding Et<sub>3</sub>N (0.14

mL), the stirring was continued for 12h. After the reaction was completed and monitored by TLC, solvent was evaporated and the crude material was purified by combi-flash column chromatography (silica gel, 9% MeOH in DCM) to afford compound **C19** (0.21 g, 39%). <sup>1</sup>H NMR (300 MHz, CDCl<sub>3</sub>): δ = 8.86 (s, 1H), 8.67 (d, *J* = 6 Hz, 2H), 8.06 (dd, *J* = 6 Hz, *J* = 9 Hz, 1H), 7.90-7.85 (t, *J* = 6 Hz, 2H), 7.53 (d, *J* = 9 Hz, 2H), 7.35-7.31 (t, *J* = 6 Hz, 2H), 7.22-7.18 (m, 3H), 6.80 (dd, *J* = 9 Hz, *J* = 12 Hz, 2H), 6.67 (d, *J* = 3 Hz, 2H), 4.13 (s, 4H), 3.58-3.52 (br m, 8H), 3.28-3.24 (t, *J* = 6 Hz, 2H), 3.07-3.03 (t, *J* = 6 Hz, 2H), 1.32-1.28 (t, *J* = 6 Hz, 12H). MS-ESI (*m/z*): calcd. for [M+Na]<sup>+</sup> 805.28; found 805.14, calcd. for [M+2Na]<sup>2+</sup> 414.13; found 414.17.

**Compound C21:** To compound **C19** (0.20 g, 0.255 mmol) in anhydrous DMF (5 mL) were added **C20** (tert-butyl 2 bromoacetate) (0.054 g, 0.28 mmol) and K<sub>2</sub>CO<sub>3</sub> (0.128 mg, 0.541 mmol) under argon. The reaction mixture was stirred for 12h. The solvent was evaporated and the crude was purified by combi-flash column chromatography (silica gel, 6% MeOH in DCM) to afford **C21** as a pinkish solid (0.15 g) in 66% yield. <sup>1</sup>H NMR (300 MHz, CDCl<sub>3</sub>): δ = 8.72 (br s, 2H), 8.07- 8.03 (t, *J* = 3 Hz, 2H), 7.96- 7.89 (m, 2H), 7.49- 7.45 (t, *J* = 6 Hz, 2H), 7.30- 7.21 (m, 5H), 6.85 (d, *J* = 9 Hz, 2H), 6.62 (br s, 2H), 4.41 (s, 4H), 4.10 (s, 2H), 3.69- 3.64 (t, *J* = 6 Hz, 2H), 3.60- 3.50 (br q, 8H), 3.30-3.26 (t, *J* = 6 Hz, 2H), 1.42 (s, 9H), 1.33-1.28 (t, *J* = 6 Hz, 12H). HRMS-ESI (*m/z*): calcd. for [M+Na]<sup>+</sup> 919.3493; found 919.3463. The *tertiary* ester group of compound **C21** was deprotected as follows: trifluoroacetic acid (1 mL) was added to a solution of **C21** (0.15 g, 0.016 mmol) in DCM (1 mL) at 0 °C. Then the reaction mixture was allowed to warm up to room temperature and stirring was continued for 2h. After the reaction was completed, DCM and TFA were evaporated and the residue was dried under high vacuum for 6h to obtain compound **C22**.

**Compound C25:** To a stirred solution of **C23** (fluorescein isothiocyanate) (0.2 g, 0.512 mmol) in dry DMF (5 mL) were added **C24** (tert-butyl (2-aminoethyl)carbamate) (0.09 g, 0.563 mmol) and DIEA (0.106 mL, 6.14 mmol) under argon. The solution was stirred for 12h under dark conditions. After removing the solvent, the residue was re-dissolved in DCM/MeOH (4:1 v/v, 50 mL) and washed twice with water (50 mL) and then with brine (20 mL). The organic layer was dried over anhydrous sodium sulfate and evaporated to

dryness. The organic layer was evaporated and the crude material was purified by combi-flash column chromatography (silica gel, 2.8% MeOH in DCM) to obtain **C25** (0.12 g, 53%) as a white solid.  $^1\text{H}$  NMR (300 MHz,  $\text{CD}_3\text{OD}$ ):  $\delta$  = 8.08 (s, 1H), 7.76 (dd,  $J$  = 3 Hz,  $J$  = 6 Hz 1H), 7.18 (s, 1H), 7.15 (br s, 1H), 6.76 (d,  $J$  = 9 Hz, 1H), 6.68 (d,  $J$  = 3 Hz, 1H), 6.58 (d,  $J$  = 3 Hz, 1H), 6.55 (d,  $J$  = 3 Hz, 2H), 3.74- 3.70 (t,  $J$  = 6 Hz, 2H), 3.33- 3.31 (br t, 2H), 1.41 (s, 9H).  $^{13}\text{C}$  NMR (75 MHz,  $\text{CD}_3\text{OD}$ ):  $\delta$  = 181.5, 175.0, 170.0, 160.9, 158.5, 157.4, 152.8, 140.7, 128.9, 124.4, 119.2, 118.8, 112.8, 110.4, 78.9, 60.5, 44.2, 39.0, 27.4. HRMS-ESI ( $m/z$ ): calcd. for  $[\text{M} + \text{H}]^+$  550.1682; found 550.1648.

**Compound C28:** Trifluoroacetic acid (1 mL) was added to a solution of compound **C25** (0.122 g, 0.22 mmol) in DCM (1 mL) at 0 °C. Then the reaction mixture was allowed to warm up to room temperature and stirring was continued for 2h. After the reaction was completed, DCM and TFA were evaporated and the residue was dried under high vacuum for 6h. The crude solid was dissolved in DCM/DMF (9:1 v/v, 10 mL) and the solution was basified to pH 7-8 with DIEA (0.17 mL, 0.9 mmol). Then **C27** (N-Boc-cis-4-N-Fmoc-amino-L-proline) (0.091 g, 0.20 mmol), EDC (0.034 g, 0.22 mmol), and HOBT (0.037 g, 0.24 mmol) were added and the reaction mixture was stirred at room temperature for 18h under argon under dark conditions. The solvent was removed in vacuum and the crude was purified by combi-flash column chromatography (silica gel, 72% EtOAc in hexane) to afford **C28** as a yellow crystalline solid (0.088 g, 50%).  $^1\text{H}$  NMR (300 MHz,  $\text{CD}_3\text{OD}$ ):  $\delta$  = 8.10 (s 1H), 7.79- 7.72 (m, 3H), 7.61 (d,  $J$  = 6 Hz, 2H), 7.39- 7.35 (t,  $J$  = 6 Hz, 2H), 7.29 (d,  $J$  = 6 Hz, 2H), 7.12 (d,  $J$  = 6 Hz, 1H), 6.66 (d,  $J$  = 6 Hz, 4H), 6.53 (d,  $J$  = 6 Hz, 2H), 4.31 (s, 2H), 4.18- 4.16 (br m, 3H), 3.85- 3.74 (m, 3H), 3.60- 3.53 (t, 2H), 2.56 (br s, 1H), 2.00-1.92 (br t,  $J$  = 6 Hz, 2H), 1.44 (s, 9H).  $^{13}\text{C}$  NMR (100 MHz,  $\text{CD}_3\text{OD}$ ): 169.6, 156.6, 152.5, 151.8, 144.3, 144.2, 140.9, 140.7, 135.0, 134.3, 128.9, 128.6, 127.6, 127.4, 126.8, 124.8, 124.4, 123.9, 119.6, 112.3, 112.1, 109.5, 101.8, 80.6, 79.7, 66.3, 59.7, 59.6, 38.7, 27.51, 28.2, 27.2. HRMS-ESI ( $m/z$ ): calcd. for  $[\text{M} + \text{Na}]^+$  906.2785; found 906.2802.

**Compound C30:** First, compound **C28** (0.08 g, 0.09 mmol) was dissolved in 20% piperidine in DMF (1.5 mL). The reaction mixture was stirred for 2h at room temperature under dark conditions. After the reaction was completed, DMF (4 mL) was added and the

mixture was extracted with hexane ( $3 \times 10$  mL) to remove piperidine. Then DMF was removed under high vacuum at  $40\text{ }^{\circ}\text{C}$  to obtain the yellowish compound **C29**. Compound **C22** was dissolved in DCM/DMF (9:1 v/v, 10 mL) and the solution was basified to pH 7-8 with DIEA (0.17 mL, 0.9 mmol). Then, compound **C29** (0.04 g, 0.06 mmol), EDC (0.011 g, 0.073 mmol), and HOBT (0.012 g, 0.078 mmol) were added and the reaction mixture was stirred at room temperature for 18h under argon and under dark conditions. The solvent was removed in vacuum and the crude was purified by combi-flash column chromatography (silica gel, 12% DCM in methanol) to afford **C30** (0.04 g, 44%).  $^1\text{H}$  NMR (300 MHz,  $\text{CD}_3\text{OD}$ ):  $\delta = 8.51- 8.39$  (br m, 2H), 8.26-8.17 (m, 1H), 8.00 (d,  $J = 3$  Hz, 1H), 7.75- 7.72 (m, 4H), 7.66-7.64 (m, 4H), 7.34 (d,  $J = 6$  Hz, 4H), 7.11- 7.05 (br m, 2H), 6.86 (d,  $J = 9$  Hz, 1H), 6.73 (br s, 1H), 6.65-6.62 (m, 4 H), 6.51 (d,  $J = 6$  Hz, 2H), 4.23- 4.05 (m, 3H), 3.92 (br s, 2H), 3.81 (s, 2H), 3.31 (d,  $J = 3$  Hz, 4H), 3.19 (d,  $J = 3\text{Hz}$ , 3H), 2.92 (br s, 1H), 2.84 (br m, 2H), 2.15-2.13 (m, 8 H), 2.03- 1.94 (m, 2H), 1.60 (m, 1H), 1.41-1.36 (t,  $J = 9$  Hz, 12H), 1.20 (s, 9H). MS-ESI ( $m/z$ ): calcd. for  $[\text{M-H}]^-$  1483.50; found 1483.67, calcd. for  $[\text{M-2H}]^{2-}$  741.51; found 741.12.

**Compound m-SMS:** Compound **C30** (0.03 g, 0.02 mmol) was dissolved in 50% TFA in DCM (1:1 v/v, 2 mL) and the mixture was stirred at room temperature for 4h. After the reaction was completed, DCM and TFA were evaporated and the residue was dried under high vacuum to afford compound **C31** as a sticky solid. **C31** was dissolved in dry DMF (3 mL) and the solution was basified to pH 7-8 with DIEA (0.18 mL, 1.6 mmol). This solution was added dropwise to a stirred solution of **C11** (0.11 g, 0.019 mmol) in dry DMF (1 mL). After adding EDC (0.003 g, 0.018 mmol) and HOBT (0.021 g, 0.003 mmol), the reaction mixture was stirred for 12h. After removing the solvent, the crude was purified on a preparative RP-HPLC using mobile phase A (0.1% TFA in  $\text{H}_2\text{O}$ ) and B (0.1% TFA in ACN/ $\text{H}_2\text{O}$ , 3:1, v/v) to afford a bluish-violet solid (4 mg, 10%). The purity of m-SMS was analyzed by analytical RP-HPLC.  $^1\text{H}$  NMR (600 MHz,  $\text{CD}_3\text{OD}$ ):  $\delta = 9.02$  (d,  $J = 6$  Hz, 1H), 8.74 (d,  $J = 6$  Hz, 3H), 8.50 (s, 2H), 8.40 (s, 1H), 8.35 (d,  $J = 6$  Hz, 1H), 8.2 (s, 1H), 8.10-8.03 (m, 3H), 8.0-7.97 (t,  $J = 6$  Hz, 2H), 7.88- 7.87 (t,  $J = 6$  Hz, 3H), 7.67 (d,  $J = 12$  Hz, 2H), 7.59-7.55 (m, 3H), 7.43 (d,  $J = 6\text{Hz}$ , 1H), 7.27-7.26 (m, 1H), 7.14- 7.05 (m, 3H), 7.0 (br s, 1H), 6.94-6.90 (m, 4H), 6.92-6.59 (m, 4H), 6.51-6.50 (t,  $J = 6$  Hz, 3H), 4.51 (br s, 6H), 4.09-3.95 (m, 5 H) 3.81-3.64 (br s, 14 H), 3.45 (br m,

1H), 3.2 (s, 2H), 3.14-3.13 (t,  $J = 6$  Hz, 2H), 2.82 (s, 2H), 2.69-2.68 (m, 2H), 2.13-2.11 (m, 2H), 2.05 (s, 2H), 2.01-1.95 (t,  $J = 3$  Hz, 2H), 1.28 (br m, 18 H.). HRMS-ESI ( $m/z$ ): calcd. for  $[(M+2MeOH-2H_2O)]$  1973.7212; found 1973.7263.

**Compound C33.** Compound **C32** (0.5 g, 1.9 mmol) and glycine tert-butyl ester hydrochloride (0.39 g, 2.3 mmol) were dissolved in THF (20 mL). To this mixture, DIEA (0.68 mL, 3.82 mmol) and HATU (0.87 g, 2.29 mmol) were subsequently added at room temperature. The brown reaction mixture turned into a clear yellow solution after 30 min. The reaction mixture was stirred for 3h at room temperature. Then, the solvent was evaporated. The obtained solid was purified by flash chromatography using hexane/ethyl acetate (1:1) to afford compound **C33** as a yellow solid (0.63 g, 88%).  $^1H$  NMR (300 MHz,  $CDCl_3$ )  $\delta = 9.18$  (t,  $J = 4.9$  Hz, 1H), 8.69 (s, 1H), 7.42 (d,  $J = 8.9$  Hz, 1H), 7.26 (s, 1H), 6.65 (dd,  $J = 8.9, 2.3$  Hz, 1H), 6.51 (d,  $J = 2.1$  Hz, 1H), 4.12 (d,  $J = 5.4$  Hz, 2H), 3.45 (q,  $J = 7.1$  Hz, 4H), 1.49 (s, 9H), 1.23 (t,  $J = 7.1$  Hz, 6H).  $^{13}C$  NMR (75 MHz,  $CDCl_3$ )  $\delta = 168.85, 163.35, 162.61, 157.82, 152.58, 148.32, 131.28, 110.15, 108.56, 96.94, 82.07, 45.30, 42.56, 28.17, 12.49$ . HRMS-ESI ( $m/z$ ): calcd. for  $[M+Na]^+$  397.1739; found 397.1740.

**Compound 36.** Trifluoroacetic acid (2.5 mL) was added to a solution of compound **C33** (0.63 g, 1.68 mmol) in DCM (2.5 mL). The reaction mixture was stirred overnight at room temperature. The solvent and TFA were then evaporated to yield an oily liquid. Addition of ethanol to the oily liquid afforded a bright yellow solid. Then it was filtered and washed with ethanol (5 mL), followed by diethyl ether (5 mL). The solid was vacuum dried to afford **C34** (0.39 g, 73%). This compound was used in the next step without further characterization. Compound **C34** (0.39 g, 1.23 mmol) and compound **C35**<sup>3</sup> (0.48 g, 1.23 mmol) were dissolved in THF (15 mL). Then DIEA (0.42 mL) and HATU (0.56 g, 1.47 mmol) were added. The reaction mixture was stirred for 4h at room temperature. The solvent was evaporated. The residue was dissolved in DCM (20 mL), passed through a sintered glass filter containing a pad of neutral alumina and eluted with DCM (100 mL). The eluted fraction was evaporated and purified by a combi-flash column chromatography, using 1% methanol in DCM to afford compound **C36** as a bright yellow solid (0.41g, 48%).  $^1H$  NMR (300 MHz,  $CDCl_3$ )  $\delta = 9.41$  (t,  $J = 4.5$  Hz,

1H), 8.67 (s, 1H), 7.91 (d,  $J = 4.8$  Hz, 1H), 7.75 (d,  $J = 7.4$  Hz, 2H), 7.65-7.57 (m, 2H), 7.40 (dd,  $J = 12.6, 5.7$  Hz, 2H), 7.35-7.27 (m, 2H), 7.05 (d,  $J = 6.9$  Hz, 1H), 6.71 – 6.58 (m, 1H), 6.50 (s, 1H), 4.79 (d,  $J = 8.7$  Hz, 1H), 4.53-4.38 (m, 1H), 4.35-4.07 (m, 6H), 3.99-3.87 (m, 1H), 3.74 (dt,  $J = 31.7, 7.8$  Hz, 2H), 3.44 (q,  $J = 13.5$ , 4H), 2.56-2.22 (m, 2H), 2.20 (s, 1H), 1.24 (t,  $J = 6.9$  Hz, 6H). HRMS-ESI ( $m/z$ ): calcd. for  $[M+Na]^+$  712.2747; found 712.2762.

**Compound C39.** Compound **C36** (0.33 g, 0.49 mmol) was deprotected using 20% piperidine in DMF (1 mL). After 1 h, diethyl ether (30 mL) was added and the resulting precipitate was filtered and washed several times with diethyl ether and twice with hexane (10 mL). The obtained yellow solid (**C37**) was dried under vacuum and used in the next step. Compound **C37** (0.13 g, 0.28 mmol) and **C38**<sup>4</sup> (0.15 g, 0.28 mmol) were placed in a round bottomed flask. Then, THF (5 mL), DIEA (0.06 mL), and HATU (0.13 g, 0.34 mmol) were subsequently added. The resulting mixture was stirred overnight at room temperature. The solvent was evaporated and the residue was dissolved in DCM (50 mL). The reaction mixture containing DCM was washed twice with water and dried over sodium sulfate. The organic layer was evaporated and purified on an alumina column using and 1% methanol in DCM to afford a yellow solid (0.12 g, 44%). <sup>1</sup>H NMR (300 MHz, CDCl<sub>3</sub>)  $\delta = 9.37$  (t,  $J = 4.6$  Hz, 1H), 8.65 (s, 1H), 7.97 (s, 1H), 7.86 (s, 1H), 7.41 (d,  $J = 9.0$  Hz, 1H), 6.63 (dd,  $J = 8.9, 1.9$  Hz, 1H), 6.49 (d,  $J = 1.7$  Hz, 1H), 4.75 (d,  $J = 8.1$  Hz, 1H), 4.60 (dd,  $J = 8.1, 4.5$  Hz, 1H), 4.35-3.69 (m, 6H), 3.65-3.46 (m, 6H), 3.44 (q,  $J = 14.2$  Hz, 4H), 3.32 (s, 6H), 3.24 (d,  $J = 2.7$  Hz, 2H), 2.84 (s, 4H), 2.35 (d,  $J = 13.7$  Hz, 1H), 2.23 (s, 1H), 2.22 (s, 1H), 1.45 (s, 9H), 1.43 (s, 18H), 1.22 (t,  $J = 7.0$  Hz, 6H). <sup>13</sup>C NMR (75 MHz, CDCl<sub>3</sub>)  $\delta = 171.21, 170.01, 169.45, 163.48, 162.50, 157.80, 156.02, 155.50, 152.71, 148.32, 131.24, 109.97, 109.59, 108.27, 96.62, 79.59, 79.24, 79.05, 71.63, 59.83, 54.91, 54.22, 53.45, 49.72, 49.05, 47.68, 45.09, 42.42, 31.49, 29.43, 28.68, 28.51, 12.42$ . HRMS-ESI ( $m/z$ ): calcd. for  $[M+Na]^+$  1002.5276; found 1002.5262.

**Compound m-SMS<sub>2</sub>.** Compound **C39** (30 mg, 31  $\mu$ mol) and **C40**<sup>5</sup> (30 mg, 61  $\mu$ mol) were dissolved in DMF/ DCM (4 mL; 1:1). Then, acetic acid (2.5  $\mu$ L) and triethyl amine (5  $\mu$ L) were added. After degassing the solution with argon, CuI (1 mg, 5  $\mu$ mol) was added under argon. Then, a solution of sodium ascorbate (2 mg, 10  $\mu$ mol) in H<sub>2</sub>O (100



$\mu\text{L}$ ) was added via a syringe needle. The reaction mixture was stirred under argon for 18h. After removing the solvent, the crude was purified by RP- HPLC. Then, the boc groups were removed using 30% TFA in DCM (2 mL). After evaporation of TFA and DCM, the crude reaction mixture was purified by RP-HPLC to afford m-SMS<sub>2</sub> (2 mg, 6%). <sup>1</sup>H NMR (500 MHz, MeOD)  $\delta$  8.63 (s, 1H), 8.23 (s, 1H), 8.13 (s, 1H), 7.68 (d,  $J$  = 8.6 Hz, 1H), 7.55 (d,  $J$  = 8.9 Hz, 1H), 7.14 (d,  $J$  = 7.9 Hz, 1H), 6.84 (d,  $J$  = 8.7 Hz, 1H), 6.72 (s(br), 3H), 6.62 (s, 1H), 6.58 (d,  $J$  = 8.1 Hz, 2H), 4.34-4.30 (m, 1H), 3.94 (dd,  $J$  = 10.1, 5.6 Hz, 1H), 3.68 (s, 4H), 3.55 (q,  $J$  = 6.8 Hz, 4H), 3.47 (s, 2H), 3.40 (s, 2H), 3.22 (s, 4H), 3.18 (s, 8H), 2.95 (br s, 6H), 2.58-2.52 (m, 1H), 2.38-2.30 (m, 2H), 2.18-2.15(m, 1H), 1.34-1.30 (m, 2H), 1.25 (t,  $J$  = 6.7 Hz, 6H). HRMS-ESI ( $m/z$ ): calcd. for  $[\text{M}+\text{H}]^+$  1169.4991; found 1169.5023.

## Supplementary References

1. Pheaney, C.G. & Barton, J.K. Intraduplex DNA-mediated electrochemistry of covalently tethered redox-active reporters. *J. Am. Chem. Soc.* **135**, 14944-14947 (2013).
2. Hirayama, T., Taki, M., Kodan, A., Kato, H. & Yamamoto, Y. Selective labeling of tag-fused protein by tryptophan-sensitized luminescence of a terbium complex. *Chem. Commun.* **22**, 3196-3198 (2009).
3. Selvakumar, K., Motiei, L. & Margulies, D. Enzyme–artificial enzyme interactions as a means for discriminating among structurally similar isozymes. *J. Am. Chem. Soc.* **137**, 4892-4895 (2015).
4. Jeon, J.W. et al. Protein-cleaving catalyst selective for protein substrate. *Org. Lett.* **4**, 4155-4158 (2002).
5. Barnard, A. et al. Orthogonal functionalisation of  $\alpha$ -helix mimetics. *Org. Biomol. Chem.* **12**, 6794-6799 (2014).
